# Supplementary material for: Experimental demonstration of tunable refractometer based on orbital angular momentum of longitudinally structured light
Source: PubMed Central journal article supplement (PMC6107032; doi:10.1038/s41377-018-0034-9), 2018-07-25
Supplement: 41377_2018_34_MOESM1_ESM.pdf [file 41377_2018_34_MOESM1_ESM.pdf]

# Supplemental Material for: Experimental demonstration of tunable refractometer based on orbital angular momentum of longitudinally structured light

Ahmed H. Dorrah<sup>1\*</sup>, Michel Zamboni-Rached<sup>2</sup>, and Mo Mojahedi<sup>1</sup>

<sup>1</sup>Edward S. Rogers Sr. Department of Electrical and Computer Engineering, University of Toronto, Toronto, ON, M5S 3G4, Canada.

<sup>2</sup>School of Electrical and Computer Engineering, University of Campinas, Campinas, Sao Paulo 13083-852, Brazil.

May 9, 2018

## 1 Shift of spatial frequencies (k-comb) in the sensed medium

In this section, we derive the relations  $\tilde{Q} \simeq n \times Q$  and  $\Delta\tilde{Q} = (Q_1 - Q_{-1})/n$ , as discussed in section 2.1 of the article. We start from the consistency relation  $(k_z^{\ell,m})^2 + (k_\rho^{\ell,m})^2 = k_0^2$  in air and  $(\tilde{k}_z^{\ell,m})^2 + (k_\rho^{\ell,m})^2 = k^2$  in the medium, where  $k = \omega n/c$ . These relations can be re-written as  $k_z^{\ell,m} = \sqrt{k_0^2 - (k_\rho^{\ell,m})^2}$  and  $\tilde{k}_z^{\ell,m} = \sqrt{k^2 - (k_\rho^{\ell,m})^2}$ . Note also that  $k_z^{\ell,m} = Q_\ell + 2\pi m/L$  in air. Without loss of generality, let us consider the central term  $k_z^{\ell,m=0}$  such that

$$Q_\ell = k_z^{\ell,m=0} = k_0 \sqrt{1 - \left(\frac{k_\rho^{\ell,m=0}}{k_0}\right)^2} \quad (\text{S1})$$

In the paraxial regime,  $k_0 \ll k_\rho^{\ell,m=0}$ , the above expression can be expressed as

$$Q_\ell = k_z^{\ell,m=0} = k_0 \left[ 1 - \frac{1}{2} \left(\frac{k_\rho^{\ell,m=0}}{k_0}\right)^2 - \frac{1}{8} \left(\frac{k_\rho^{\ell,m=0}}{k_0}\right)^4 + \dots \right] \quad (\text{S2})$$

Similarly,

$$\tilde{Q}_\ell = \tilde{k}_z^{\ell,m=0} = k_0 n \left[ 1 - \frac{1}{2} \left( \frac{k_\rho^{\ell,m=0}}{k_0 n} \right)^2 - \frac{1}{8} \left( \frac{k_\rho^{\ell,m=0}}{k_0 n} \right)^4 + \dots \right] \quad (\text{S3})$$

The spacing between the central longitudinal wavenumbers in air and in the medium, denoted as  $\Delta Q$  and  $\Delta \tilde{Q}$ , are thus given by

$$\Delta Q_\ell = Q_\ell - Q_{-\ell} = k_0 \left[ \frac{1}{2} \left( \frac{k_\rho^{-\ell,m=0}}{k_0} \right)^2 - \frac{1}{2} \left( \frac{k_\rho^{\ell,m=0}}{k_0} \right)^2 + \frac{1}{8} \left( \frac{k_\rho^{-\ell,m=0}}{k_0} \right)^4 - \frac{1}{8} \left( \frac{k_\rho^{\ell,m=0}}{k_0} \right)^4 + \dots \right] \quad (\text{S4})$$

and

$$\Delta \tilde{Q}_\ell = \tilde{Q}_\ell - \tilde{Q}_{-\ell} = k_0 n \left[ \frac{1}{2} \left( \frac{k_\rho^{-\ell,m=0}}{k_0 n} \right)^2 - \frac{1}{2} \left( \frac{k_\rho^{\ell,m=0}}{k_0 n} \right)^2 + \frac{1}{8} \left( \frac{k_\rho^{-\ell,m=0}}{k_0 n} \right)^4 - \frac{1}{8} \left( \frac{k_\rho^{\ell,m=0}}{k_0 n} \right)^4 + \dots \right] \quad (\text{S5})$$

By only neglecting the higher order terms (raised to the fourth power) in Eq. (S4) and Eq. (S5), the relation  $\Delta \tilde{Q} \simeq (Q_1 - Q_{-1})/n$  is established. Furthermore, by neglecting all the higher order terms (raised to the power of two and four) in Eq. (S2) and Eq. (S3), it follows that  $Q \simeq k_0$  and  $\tilde{Q} \simeq k_0 n$ ; thus the relation  $\tilde{Q} \simeq n \times Q$  holds true.

## 2 Sensor's tolerance to deviations in $\theta$ , $\Delta Q$ , and $z$

In this section, we characterize the sensor's tolerance to the deviations in the angular orientation ( $\theta$ ), in the separation  $\Delta Q$ , and in the detection plane ( $z$ ), using a closed form expression. We start from Eq. (6) in the main article, which states that

$$n = \frac{1}{1 - 2\theta/(z\Delta Q)}. \quad (\text{S6})$$

By taking the partial derivatives with respect to  $\theta$ ,  $z$ , and  $\Delta Q$ , one can then establish the following relation

$$\delta n = \frac{2z\Delta Q}{[z\Delta Q - 2\theta]^2} \delta\theta + \frac{2\Delta Q\theta}{[z\Delta Q - 2\theta]^2} \delta z + \frac{2z\theta}{[z\Delta Q - 2\theta]^2} \delta\Delta Q. \quad (\text{S7})$$

Equation (S7) shows that the proposed sensing scheme is more tolerant to the deviations in the angular orientation, denoted by ( $\delta\theta$ ), when either the parameter  $\Delta Q$  or the detection plane ( $z$ ) are set to larger values. Stated otherwise, by generating OAM modes with larger separation  $\Delta Q$  and increasing the interaction length  $z$ , our sensing scheme records smaller errors when identifying the refractive index ( $n$ ), for the same deviation in  $\theta$ . This is readily discerned from the quadratic dependency on  $\Delta Q$  and  $z$  in the denominator of Eq. (S7). Hence, at larger  $\Delta Q$  and/or  $z$ , the accuracy and precision of the proposed sensor is improved and it becomes more tolerant to errors in estimating  $\theta$  as well as the uncertainty in  $z$ .
